# Supplementary material for: Acylation of the Type 3 Secretion System Translocon Using a Dedicated Acyl Carrier Protein
Source: PubMed Central journal article supplement (PMC5279801; doi:10.1371/journal.pgen.1006556), 2017-01-13
Supplement: pgen.1006556.s001.pdf [file pgen.1006556.s001.pdf]

## Part I

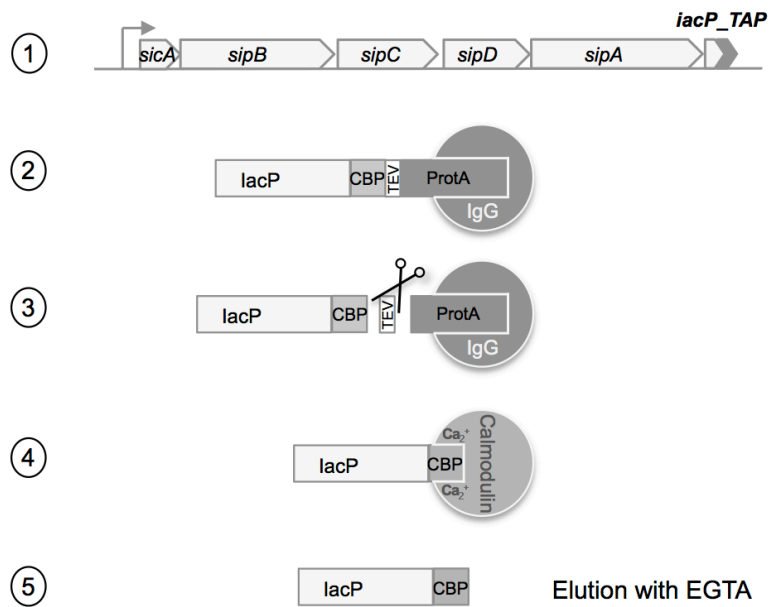

## Part II

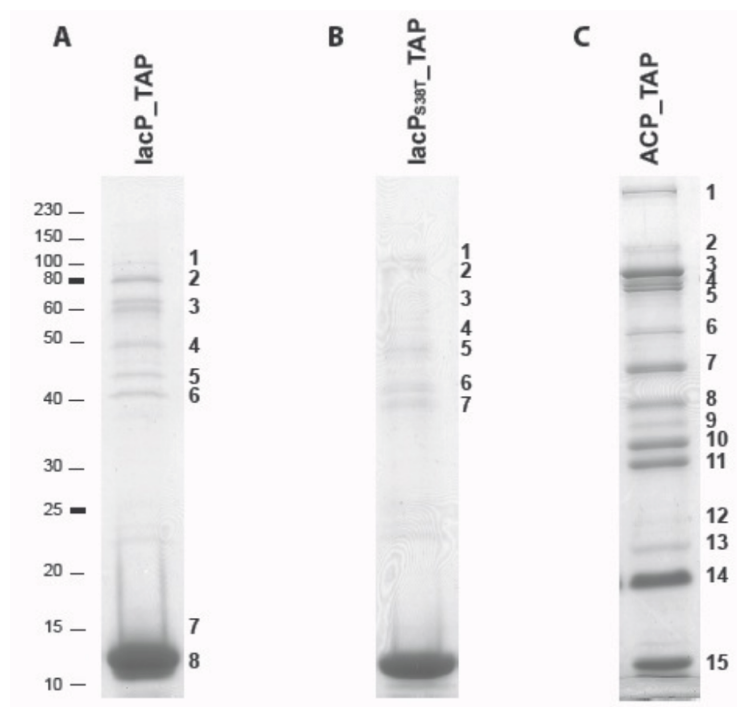

**Figure S1**  
**Part III**

| Gel                       | Band                                                   | Protein Description                                                         | Protein name | Accession    | <sup>a</sup> Mascot Score | <sup>b</sup> Sequest Score | number of peptides | % Sequence Coverage | Theoretical Protein MW (Da) |
|---------------------------|--------------------------------------------------------|-----------------------------------------------------------------------------|--------------|--------------|---------------------------|----------------------------|--------------------|---------------------|-----------------------------|
| A                         | 1                                                      | preprotein translocase subunit SecA                                         | SecA         | gi 378448436 | 255                       | 90                         | 49                 | 51                  | 101 825                     |
|                           |                                                        | cell invasion protein                                                       | SipB         | gi 378451634 | 73                        | 100                        | 15                 | 13                  | 62 450                      |
|                           |                                                        | secreted effector protein                                                   | SipA         | gi 378451631 |                           | 100                        | 12                 | 25                  | 73 967                      |
|                           |                                                        | DNA-binding ATP-dependent protease La                                       | Lon          | gi 378448788 |                           | 70                         | 15                 | 21                  | 87 411                      |
|                           | 2                                                      | cell invasion protein                                                       | SipB         | gi 378451634 | 155                       | 180                        | 9                  | 10                  | 62 450                      |
|                           |                                                        |                                                                             |              |              |                           |                            | 28                 | 53                  | 62 450                      |
|                           | 3                                                      | polyphosphate kinase                                                        | Ppk          | gi 378451235 | 124                       |                            | 89                 | 31                  | 73 455                      |
|                           |                                                        | cell invasion protein                                                       | SipB         | gi 378451634 | 172                       | 190                        | 29                 | 46                  | 62 450                      |
|                           |                                                        | cysteine desulfurase                                                        | IscS         | gi 378451286 | 95                        | 90                         | 26                 | 51                  | 45 092                      |
|                           |                                                        | 3-oxoacyl-(acyl carrier protein) synthase I                                 | FabB         | gi 378451103 |                           | 40                         | 80                 | 30                  | 42 373                      |
|                           | 4                                                      | cell invasion protein                                                       | SipB         | gi 378451634 | 64                        | 50                         | 12                 | 43                  | 62 450                      |
|                           |                                                        | translocation machinery component                                           | SseC         | gi 378449911 | 93                        |                            | 7                  | 10                  | 52 777                      |
|                           |                                                        | isovaleryl CoA dehydrogenase                                                | AidB         | gi 378453330 | 78                        |                            | 24                 | 43                  | 60 937                      |
| 5                         | 3-oxoacyl-(acyl carrier protein) synthase I            | FabB                                                                        | gi 378451103 | 118          |                           | 18                         | 37                 | 42 373              |                             |
| 6                         | cysteine desulfurase                                   | IscS                                                                        | gi 378451286 | 238          |                           | 22                         | 53                 | 45 092              |                             |
| 7                         | molybdopterin biosynthetic protein B                   | Moab                                                                        | gi 378449165 |              | 100                       | 26                         | 35                 | 18 539              |                             |
| 8                         | acyl carrier protein                                   | IacP                                                                        | gi 378451630 |              | 50                        | 31                         | 10                 | 9 198               |                             |
| B                         | 1                                                      | preprotein translocase subunit SecA                                         | SecA         | gi 378448436 | 225                       |                            | 37                 | 44                  | 101 825                     |
|                           |                                                        | recombinase A                                                               | RecA         | gi 378451567 | 63                        |                            | 10                 | 48                  | 37 944                      |
|                           | 2                                                      | DNA-binding ATP-dependent protease La                                       | Lon          | gi 378448788 | 79                        |                            | 24                 | 37                  | 87 411                      |
|                           |                                                        | hypothetical protein                                                        | Sirp         | gi 378449162 | 61                        |                            | 16                 | 35                  | 86 944                      |
|                           | 3                                                      | molecular chaperone DnaK                                                    | DnaK         | gi 378448287 | 108                       |                            | 19                 | 41                  | 69 258                      |
|                           | 4                                                      | glycerol kinase                                                             | GlpK         | gi 378453005 |                           | 150                        | 26                 | 28                  | 56 051                      |
|                           | 5                                                      | inosine-guanosine kinase                                                    | Gsk          | gi 378448832 | 72                        |                            | 6                  | 44                  | 48 384                      |
|                           | 6                                                      | recombinase A                                                               | RecA         | gi 378451567 | 107                       |                            | 13                 | 56                  | 37 944                      |
|                           |                                                        | DnaJ protein                                                                | DnaJ         | gi 378448288 | 82                        |                            | 15                 | 39                  | 41 312                      |
|                           |                                                        | cell division protein FtsZ                                                  | FtsZ         | gi 378448433 | 76                        |                            | 13                 | 38                  | 40 323                      |
| 7                         | lipid-A-disaccharide synthase                          | LpxB                                                                        | gi 378448542 | 90           |                           | 19                         | 52                 | 42 451              |                             |
|                           | DnaJ protein                                           | DnaJ                                                                        | gi 378448288 | 71           |                           | 17                         | 48                 | 41 312              |                             |
| C                         | 1                                                      | cell division protein MukB                                                  | MukB         | gi 378449355 | 554                       |                            | 92                 | 58                  | 170 043                     |
|                           | 2                                                      | preprotein translocase subunit SecA                                         | SecA         | gi 378448436 | 162                       |                            | 45                 | 47                  | 101 825                     |
|                           |                                                        | cell division protein MukB                                                  | MukB         | gi 378449355 | 79                        |                            | 23                 | 24                  | 170 043                     |
|                           |                                                        | 3-oxoacyl-(acyl carrier protein) synthase I                                 | FabB         | gi 378451103 | 66                        |                            | 11                 | 31                  | 42 373                      |
|                           | 3                                                      | bifunctional (p)ppGpp synthetase II/ guanosine-3',5'-bis pyr                | SpoT         | gi 378452627 | 183                       |                            | 48                 | 63                  | 79 515                      |
|                           |                                                        | glycerol-3-phosphate acyltransferase                                        | PlsB         | gi 378453167 | 169                       |                            | 44                 | 60                  | 91 128                      |
|                           | 4                                                      | bifunctional acyl-[acyl carrier protein] synthetase/2-acylglycerophospho... | Aas          | gi 378451779 | 263                       |                            | 52                 | 56                  | 80 508                      |
|                           |                                                        | polyphosphate kinase                                                        | Ppk          | gi 378451235 | 174                       |                            | 37                 | 53                  | 73 455                      |
|                           | 5                                                      | polyphosphate kinase                                                        | Ppk          | gi 378451235 | 524                       |                            | 71                 | 81                  | 73 455                      |
|                           | 6                                                      | isovaleryl CoA dehydrogenase                                                | AidB         | gi 378453330 | 248                       |                            | 44                 | 54                  | 60 937                      |
|                           | 7                                                      | 3-oxoacyl-(acyl carrier protein) synthase I                                 | FabB         | gi 378451103 | 134                       |                            | 27                 | 74                  | 42 373                      |
|                           |                                                        | 3-oxoacyl-(acyl carrier protein) synthase II                                | FabF         | gi 378449594 | 130                       |                            | 25                 | 81                  | 42 952                      |
|                           | 8                                                      | UDP-3-O-[3-hydroxymyristoyl] glucosamine N-acyltransferase                  | LpxD         | gi 378448539 | 109                       |                            | 19                 | 38                  | 35 930                      |
|                           |                                                        | putative acetyltransferase                                                  | YiiD         | gi 378452936 | 69                        |                            | 12                 | 46                  | 36 917                      |
|                           | 9                                                      | putative acetyltransferase                                                  | YiiD         | gi 378452936 | 88                        |                            | 16                 | 38                  | 36 917                      |
| transcriptional regulator |                                                        | Rob                                                                         | gi 378453571 | 66           |                           | 11                         | 32                 | 33 243              |                             |
| 10                        | putative acetyltransferase                             | YiiD                                                                        | gi 378452936 | 165          |                           | 23                         | 53                 | 36 917              |                             |
| 11                        | bifunctional riboflavin kinase/FMN adenylyltransferase | RibF                                                                        | gi 378448328 | 141          |                           | 16                         | 71                 | 34 270              |                             |
|                           | phosphoribulokinase                                    | PrkB                                                                        | gi 378452296 | 131          |                           | 21                         | 54                 | 32 412              |                             |
| 12                        | uroporphyrinogen-III synthase                          | HemD                                                                        | gi 378452836 | 181          |                           | 18                         | 80                 | 27 661              |                             |
| 13                        | 3-ketoacyl-(acyl-carrier-protein) reductase            | FabG                                                                        | gi 378449592 | 144          |                           | 19                         | 64                 | 25 545              |                             |
| 14                        | acyl carrier protein                                   | ACP                                                                         | gi 378449593 |              | 20                        | 5                          | 13                 | 8 639               |                             |
| 15                        | (3R)-hydroxymyristoyl-ACP dehydratase                  | FabZ                                                                        | gi 378448540 |              | 150                       | 67                         | 58                 | 20 532              |                             |
