# Supplementary material for: Acylation of the Type 3 Secretion System Translocon Using a Dedicated Acyl Carrier Protein
Source: PubMed Central journal article supplement (PMC5279801; doi:10.1371/journal.pgen.1006556), 2017-01-13

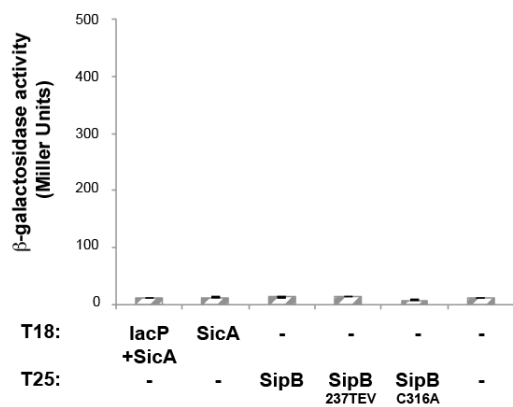

Supplement: pgen.1006556.s003.pdf [file pgen.1006556.s003.pdf]
