# Supplementary material for: Acylation of the Type 3 Secretion System Translocon Using a Dedicated Acyl Carrier Protein
Source: PubMed Central journal article supplement (PMC5279801; doi:10.1371/journal.pgen.1006556), 2017-01-13

**Autoradiogram**

**Coomassie blue**

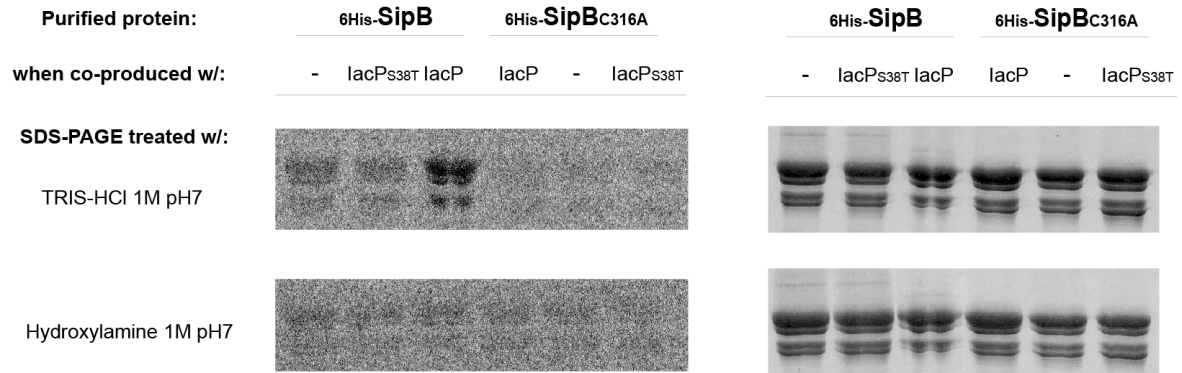

Supplement: pgen.1006556.s004.pdf [file pgen.1006556.s004.pdf]
