# Supplementary material for: Acylation of the Type 3 Secretion System Translocon Using a Dedicated Acyl Carrier Protein
Source: PubMed Central journal article supplement (PMC5279801; doi:10.1371/journal.pgen.1006556), 2017-01-13
Supplement: pgen.1006556.s005.pdf [file pgen.1006556.s005.pdf]

01\_YP\_005238594|Salmonella enterica serovar\_Typhimurium\_1402871-583  
02\_YP\_004731325|Salmonella bongori|NCTC\_124191-593  
03\_MP\_9022269|Chromobacterium violaceum|ATCC\_12472/1-583  
04\_YP\_001883189|Shigella boydii|CDC\_3063\_94/1-580  
05\_YP\_4061675|Shigella dysenteriae|SD19/71-580  
06\_MP\_858261|Shigella flexneri|2a\_301/1-580  
07\_YP\_313345|Shigella sonnei|Ss046/1-580  
08\_YP\_003538652|Erwinia amylovora|ATCC\_49946/1-633  
09\_YP\_002646889|Erwinia pyrifoliae|Epi\_196/1-633  
10\_YP\_003359721|Erwinia amylovora|ATCC\_49946/1-672  
11\_YP\_001908602|Erwinia tasmaniensis|Et1\_94/1-628  
12\_YP\_001063159|Burkholderia pseudomallei|668/1-620  
13\_YP\_001077594|Burkholderia thailandensis|NSMB121/1-627  
14\_YP\_0070390620|Pseudomonas putida|UM4/1-593  
15\_YP\_0070390620|Pseudomonas putida|UM4/1-593  
16\_YP\_005207210|Pseudomonas fluorescens|F113/1-589  
17\_YP\_001077603|Yersinia enterocolitica|808/1-676  
18\_YP\_002245203|Pseudomonas putida|UM4/1-593  
19\_YP\_005819304|Erwinia pyrifoliae|Epi617/1-633  
20\_YP\_005802692|Erwinia pyrifoliae|DSM\_12163/1-633  
21\_YP\_001907829|Erwinia tasmaniensis|Et1\_94/1-636  
22\_YP\_454254|Socialis glossinidius|norstani/1-658  
23\_YP\_003375999|Xanthomonas abutilonis|GPE\_FC73/1-534  
24\_YP\_002152384|Proteus mirabilis|H432/01-719  
25\_YP\_002924283|Candidatus\_Hamiltonella defensa|547/1-472  
26\_YP\_006146280|Escherichia coli|O7:K1\_ser\_CE101-593

Consensus

128 EFQTALGEAQEATDLY  
129 EFQALGGEAQEATDLY  
130 EFQALGGEAQEATDLY  
131 EFQALGGEAQEATDLY  
132 EFQALGGEAQEATDLY  
133 EFQALGGEAQEATDLY  
134 EFQALGGEAQEATDLY  
135 EFQALGGEAQEATDLY  
136 EFQALGGEAQEATDLY  
137 EFQALGGEAQEATDLY  
138 EFQALGGEAQEATDLY  
139 EFQALGGEAQEATDLY  
140 EFQALGGEAQEATDLY  
141 EFQALGGEAQEATDLY  
142 EFQALGGEAQEATDLY  
143 EFQALGGEAQEATDLY  
144 EFQALGGEAQEATDLY  
145 EFQALGGEAQEATDLY  
146 EFQALGGEAQEATDLY  
147 EFQALGGEAQEATDLY  
148 EFQALGGEAQEATDLY  
149 EFQALGGEAQEATDLY  
150 EFQALGGEAQEATDLY  
151 EFQALGGEAQEATDLY  
152 EFQALGGEAQEATDLY  
153 EFQALGGEAQEATDLY  
154 EFQALGGEAQEATDLY  
155 EFQALGGEAQEATDLY  
156 EFQALGGEAQEATDLY  
157 EFQALGGEAQEATDLY  
158 EFQALGGEAQEATDLY  
159 EFQALGGEAQEATDLY  
160 EFQALGGEAQEATDLY  
161 EFQALGGEAQEATDLY  
162 EFQALGGEAQEATDLY  
163 EFQALGGEAQEATDLY  
164 EFQALGGEAQEATDLY  
165 EFQALGGEAQEATDLY  
166 EFQALGGEAQEATDLY  
167 EFQALGGEAQEATDLY  
168 EFQALGGEAQEATDLY  
169 EFQALGGEAQEATDLY  
170 EFQALGGEAQEATDLY  
171 EFQALGGEAQEATDLY  
172 EFQALGGEAQEATDLY  
173 EFQALGGEAQEATDLY  
174 EFQALGGEAQEATDLY  
175 EFQALGGEAQEATDLY  
176 EFQALGGEAQEATDLY  
177 EFQALGGEAQEATDLY  
178 EFQALGGEAQEATDLY  
179 EFQALGGEAQEATDLY  
180 EFQALGGEAQEATDLY  
181 EFQALGGEAQEATDLY  
182 EFQALGGEAQEATDLY  
183 EFQALGGEAQEATDLY  
184 EFQALGGEAQEATDLY  
185 EFQALGGEAQEATDLY  
186 EFQALGGEAQEATDLY  
187 EFQALGGEAQEATDLY  
188 EFQALGGEAQEATDLY  
189 EFQALGGEAQEATDLY  
190 EFQALGGEAQEATDLY  
191 EFQALGGEAQEATDLY  
192 EFQALGGEAQEATDLY  
193 EFQALGGEAQEATDLY  
194 EFQALGGEAQEATDLY  
195 EFQALGGEAQEATDLY  
196 EFQALGGEAQEATDLY  
197 EFQALGGEAQEATDLY  
198 EFQALGGEAQEATDLY  
199 EFQALGGEAQEATDLY  
200 EFQALGGEAQEATDLY  
201 EFQALGGEAQEATDLY  
202 EFQALGGEAQEATDLY  
203 EFQALGGEAQEATDLY  
204 EFQALGGEAQEATDLY  
205 EFQALGGEAQEATDLY  
206 EFQALGGEAQEATDLY  
207 EFQALGGEAQEATDLY  
208 EFQALGGEAQEATDLY  
209 EFQALGGEAQEATDLY  
210 EFQALGGEAQEATDLY  
211 EFQALGGEAQEATDLY  
212 EFQALGGEAQEATDLY  
213 EFQALGGEAQEATDLY  
214 EFQALGGEAQEATDLY  
215 EFQALGGEAQEATDLY  
216 EFQALGGEAQEATDLY  
217 EFQALGGEAQEATDLY  
218 EFQALGGEAQEATDLY  
219 EFQALGGEAQEATDLY  
220 EFQALGGEAQEATDLY  
221 EFQALGGEAQEATDLY  
222 EFQALGGEAQEATDLY  
223 EFQALGGEAQEATDLY  
224 EFQALGGEAQEATDLY  
225 EFQALGGEAQEATDLY  
226 EFQALGGEAQEATDLY  
227 EFQALGGEAQEATDLY  
228 EFQALGGEAQEATDLY  
229 EFQALGGEAQEATDLY  
230 EFQALGGEAQEATDLY  
231 EFQALGGEAQEATDLY  
232 EFQALGGEAQEATDLY  
233 EFQALGGEAQEATDLY  
234 EFQALGGEAQEATDLY  
235 EFQALGGEAQEATDLY  
236 EFQALGGEAQEATDLY  
237 EFQALGGEAQEATDLY  
238 EFQALGGEAQEATDLY  
239 EFQALGGEAQEATDLY  
240 EFQALGGEAQEATDLY  
241 EFQALGGEAQEATDLY  
242 EFQALGGEAQEATDLY  
243 EFQALGGEAQEATDLY  
244 EFQALGGEAQEATDLY  
245 EFQALGGEAQEATDLY  
246 EFQALGGEAQEATDLY  
247 EFQALGGEAQEATDLY  
248 EFQALGGEAQEATDLY  
249 EFQALGGEAQEATDLY  
250 EFQALGGEAQEATDLY  
251 EFQALGGEAQEATDLY  
252 EFQALGGEAQEATDLY  
253 EFQALGGEAQEATDLY  
254 EFQALGGEAQEATDLY  
255 EFQALGGEAQEATDLY  
256 EFQALGGEAQEATDLY  
257 EFQALGGEAQEATDLY  
258 EFQALGGEAQEATDLY  
259 EFQALGGEAQEATDLY  
260 EFQALGGEAQEATDLY  
261 EFQALGGEAQEATDLY  
262 EFQALGGEAQEATDLY  
263 EFQALGGEAQEATDLY  
264 EFQALGGEAQEATDLY  
265 EFQALGGEAQEATDLY  
266 EFQALGGEAQEATDLY  
267 EFQALGGEAQEATDLY  
268 EFQALGGEAQEATDLY  
269 EFQALGGEAQEATDLY  
270 EFQALGGEAQEATDLY  
271 EFQALGGEAQEATDLY  
272 EFQALGGEAQEATDLY  
273 EFQALGGEAQEATDLY  
274 EFQALGGEAQEATDLY  
275 EFQALGGEAQEATDLY  
276 EFQALGGEAQEATDLY  
277 EFQALGGEAQEATDLY  
278 EFQALGGEAQEATDLY  
279 EFQALGGEAQEATDLY  
280 EFQALGGEAQEATDLY  
281 EFQALGGEAQEATDLY  
282 EFQALGGEAQEATDLY  
283 EFQALGGEAQEATDLY  
284 EFQALGGEAQEATDLY  
285 EFQALGGEAQEATDLY  
286 EFQALGGEAQEATDLY  
287 EFQALGGEAQEATDLY  
288 EFQALGGEAQEATDLY  
289 EFQALGGEAQEATDLY  
290 EFQALGGEAQEATDLY  
291 EFQALGGEAQEATDLY  
292 EFQALGGEAQEATDLY  
293 EFQALGGEAQEATDLY  
294 EFQALGGEAQEATDLY  
295 EFQALGGEAQEATDLY  
296 EFQALGGEAQEATDLY  
297 EFQALGGEAQEATDLY  
298 EFQALGGEAQEATDLY  
299 EFQALGGEAQEATDLY  
300 EFQALGGEAQEATDLY  
301 EFQALGGEAQEATDLY  
302 EFQALGGEAQEATDLY  
303 EFQALGGEAQEATDLY  
304 EFQALGGEAQEATDLY  
305 EFQALGGEAQEATDLY  
306 EFQALGGEAQEATDLY  
307 EFQALGGEAQEATDLY  
308 EFQALGGEAQEATDLY  
309 EFQALGGEAQEATDLY  
310 EFQALGGEAQEATDLY  
311 EFQALGGEAQEATDLY  
312 EFQALGGEAQEATDLY  
313 EFQALGGEAQEATDLY  
314 EFQALGGEAQEATDLY  
315 EFQALGGEAQEATDLY  
316 EFQALGGEAQEATDLY  
317 EFQALGGEAQEATDLY  
318 EFQALGGEAQEATDLY  
319 EFQALGGEAQEATDLY  
320 EFQALGGEAQEATDLY  
321 EFQALGGEAQEATDLY  
322 EFQALGGEAQEATDLY  
323 EFQALGGEAQEATDLY  
324 EFQALGGEAQEATDLY  
325 EFQALGGEAQEATDLY  
326 EFQALGGEAQEATDLY  
327 EFQALGGEAQEATDLY  
328 EFQALGGEAQEATDLY  
329 EFQALGGEAQEATDLY  
330 EFQALGGEAQEATDLY  
331 EFQALGGEAQEATDLY  
332 EFQALGGEAQEATDLY  
333 EFQALGGEAQEATDLY  
334 EFQALGGEAQEATDLY  
335 EFQALGGEAQEATDLY  
336 EFQALGGEAQEATDLY  
337 EFQALGGEAQEATDLY  
338 EFQALGGEAQEATDLY  
339 EFQALGGEAQEATDLY  
340 EFQALGGEAQEATDLY  
341 EFQALGGEAQEATDLY  
342 EFQALGGEAQEATDLY  
343 EFQALGGEAQEATDLY  
344 EFQALGGEAQEATDLY  
345 EFQALGGEAQEATDLY  
346 EFQALGGEAQEATDLY  
347 EFQALGGEAQEATDLY  
348 EFQALGGEAQEATDLY  
349 EFQALGGEAQEATDLY  
350 EFQALGGEAQEATDLY  
351 EFQALGGEAQEATDLY  
352 EFQALGGEAQEATDLY  
353 EFQALGGEAQEATDLY  
354 EFQALGGEAQEATDLY  
355 EFQALGGEAQEATDLY  
356 EFQALGGEAQEATDLY  
357 EFQALGGEAQEATDLY  
358 EFQALGGEAQEATDLY  
359 EFQALGGEAQEATDLY  
360 EFQALGGEAQEATDLY  
361 EFQALGGEAQEATDLY  
362 EFQALGGEAQEATDLY  
363 EFQALGGEAQEATDLY  
364 EFQALGGEAQEATDLY  
365 EFQALGGEAQEATDLY  
366 EFQALGGEAQEATDLY  
367 EFQALGGEAQEATDLY  
368 EFQALGGEAQEATDLY  
369 EFQALGGEAQEATDLY  
370 EFQALGGEAQEATDLY  
371 EFQALGGEAQEATDLY  
372 EFQALGGEAQEATDLY  
373 EFQALGGEAQEATDLY  
374 EFQALGGEAQEATDLY  
375 EFQALGGEAQEATDLY  
376 EFQALGGEAQEATDLY  
377 EFQALGGEAQEATDLY  
378 EFQALGGEAQEATDLY  
379 EFQALGGEAQEATDLY  
380 EFQALGGEAQEATDLY  
381 EFQALGGEAQEATDLY  
382 EFQALGGEAQEATDLY  
383 EFQALGGEAQEATDLY  
384 EFQALGGEAQEATDLY  
385 EFQALGGEAQEATDLY  
386 EFQALGGEAQEATDLY  
387 EFQALGGEAQEATDLY  
388 EFQALGGEAQEATDLY  
389 EFQALGGEAQEATDLY  
390 EFQALGGEAQEATDLY  
391 EFQALGGEAQEATDLY  
392 EFQALGGEAQEATDLY  
393 EFQALGGEAQEATDLY  
394 EFQALGGEAQEATDLY  
395 EFQALGGEAQEATDLY  
396 EFQALGGEAQEATDLY  
397 EFQALGGEAQEATDLY  
398 EFQALGGEAQEATDLY  
399 EFQALGGEAQEATDLY  
400 EFQALGGEAQEATDLY  
401 EFQALGGEAQEATDLY  
402 EFQALGGEAQEATDLY  
403 EFQALGGEAQEATDLY  
404 EFQALGGEAQEATDLY  
405 EFQALGGEAQEATDLY  
406 EFQALGGEAQEATDLY  
407 EFQALGGEAQEATDLY  
408 EFQALGGEAQEATDLY  
409 EFQALGGEAQEATDLY  
410 EFQALGGEAQEATDLY  
411 EFQALGGEAQEATDLY  
412 EFQALGGEAQEATDLY  
413 EFQALGGEAQEATDLY  
414 EFQALGGEAQEATDLY  
415 EFQALGGEAQEATDLY  
416 EFQALGGEAQEATDLY  
417 EFQALGGEAQEATDLY  
418 EFQALGGEAQEATDLY  
419 EFQALGGEAQEATDLY  
420 EFQALGGEAQEATDLY  
421 EFQALGGEAQEATDLY  
422 EFQALGGEAQEATDLY  
423 EFQALGGEAQEATDLY  
424 EFQALGGEAQEATDLY  
425 EFQALGGEAQEATDLY  
426 EFQALGGEAQEATDLY  
427 EFQALGGEAQEATDLY  
428 EFQALGGEAQEATDLY  
429 EFQALGGEAQEATDLY  
430 EFQALGGEAQEATDLY  
431 EFQALGGEAQEATDLY  
432 EFQALGGEAQEATDLY  
433 EFQALGGEAQEATDLY  
434 EFQALGGEAQEATDLY  
435 EFQALGGEAQEATDLY  
436 EFQALGGEAQEATDLY  
437 EFQALGGEAQEATDLY  
438 EFQALGGEAQEATDLY  
439 EFQALGGEAQEATDLY  
440 EFQALGGEAQEATDLY  
441 EFQALGGEAQEATDLY  
442 EFQALGGEAQEATDLY  
443 EFQALGGEAQEATDLY  
444 EFQALGGEAQEATDLY  
445 EFQALGGEAQEATDLY  
446 EFQALGGEAQEATDLY  
447 EFQALGGEAQEATDLY  
448 EFQALGGEAQEATDLY  
449 EFQALGGEAQEATDLY  
450 EFQALGGEAQEATDLY  
451 EFQALGGEAQEATDLY  
452 EFQALGGEAQEATDLY  
453 EFQALGGEAQEATDLY  
454 EFQALGGEAQEATDLY  
455 EFQALGGEAQEATDLY  
456 EFQALGGEAQEATDLY  
457 EFQALGGEAQEATDLY  
458 EFQALGGEAQEATDLY  
459 EFQALGGEAQEATDLY  
460 EFQALGGEAQEATDLY  
461 EFQALGGEAQEATDLY  
462 EFQALGGEAQEATDLY  
463 EFQALGGEAQEATDLY  
464 EFQALGGEAQEATDLY  
465 EFQALGGEAQEATDLY  
466 EFQALGGEAQEATDLY  
467 EFQALGGEAQEATDLY  
468 EFQALGGEAQEATDLY  
469 EFQALGGEAQEATDLY  
470 EFQALGGEAQEATDLY  
471 EFQALGGEAQEATDLY  
472 EFQALGGEAQEATDLY  
473 EFQALGGEAQEATDLY  
474 EFQALGGEAQEATDLY  
475 EFQALGGEAQEATDLY  
476 EFQALGGEAQEATDLY  
477 EFQALGGEAQEATDLY  
478 EFQALGGEAQEATDLY  
479 EFQALGGEAQEATDLY  
480 EFQALGGEAQEATDLY  
481 EFQALGGEAQEATDLY  
482 EFQALGGEAQEATDLY  
483 EFQALGGEAQEATDLY  
484 EFQALGGEAQEATDLY  
485 EFQALGGEAQEATDLY  
486 EFQALGGEAQEATDLY  
487 EFQALGGEAQEATDLY  
488 EFQALGGEAQEATDLY  
489 EFQALGGEAQEATDLY  
490 EFQALGGEAQEATDLY  
491 EFQALGGEAQEATDLY  
492 EFQALGGEAQEATDLY  
493 EFQALGGEAQEATDLY  
494 EFQALGGEAQEATDLY  
495 EFQALGGEAQEATDLY  
496 EFQALGGEAQEATDLY  
497 EFQALGGEAQEATDLY  
498 EFQALGGEAQEATDLY  
499 EFQALGGEAQEATDLY  
500 EFQALGGEAQEATDLY

Consensus

NDATKAYDAY++L...LHPATAEKQLDK+LNSTQ+QA...NSAS...A...DR...ASLTSQHS+I+H+HOKSLSGASLTLFLMAL+TE
