# Supplementary material for: Acylation of the Type 3 Secretion System Translocon Using a Dedicated Acyl Carrier Protein
Source: PubMed Central journal article supplement (PMC5279801; doi:10.1371/journal.pgen.1006556), 2017-01-13
Supplement: pgen.1006556.s006.pdf [file pgen.1006556.s006.pdf]

| Taxon   | Organism                                                                         | RefSeq       | GI        | Genomic context (MgCV)                  | Conserved cysteine | Position on the alignment |
|---------|----------------------------------------------------------------------------------|--------------|-----------|-----------------------------------------|--------------------|---------------------------|
| 1320309 | Salmonella enterica subsp. enterica serovar Bovismorbificans str. 3114           | YP_008506733 | 538363448 | SicA > sipB > sipC > sipD > sipA > iacP | C                  |                           |
| 295319  | Salmonella enterica subsp. enterica serovar Paratyphi A str. ATCC 9150           | YP_151912    | 56414837  | SicA > sipB > sipC > sipD > sipA > iacP | C                  |                           |
| 554290  | Salmonella enterica subsp. enterica serovar Paratyphi A str. AKU_12601           | YP_002143402 | 197363765 | SicA > sipB > sipC > sipD > sipA > iacP | C                  |                           |
| 321314  | Salmonella enterica subsp. enterica serovar Choleraesuis str. SC-867             | YP_217804    | 62181387  | SicA > sipB > sipC > sipD > sipA > iacP | C                  |                           |
| 568708  | Salmonella enterica subsp. enterica serovar Typhimurium str. D23580              | YP_005233874 | 378446242 | SicA > sipB > sipC > sipD > sipA > iacP | C                  |                           |
| 550538  | Salmonella enterica subsp. enterica serovar Gallinarum str. 287/91               | YP_00227629  | 205353828 | SicA > sipB > sipC > sipD > sipA > iacP | C                  |                           |
| 866913  | Salmonella enterica subsp. enterica serovar 4/5/12:-: str. 08-1736               | YP_008267091 | 526221304 | SicA > sipB > sipC > sipD > sipA > iacP | C                  |                           |
| 85569   | Salmonella enterica subsp. enterica serovar Typhimurium str. DT104               | YP_008671341 | 550902249 | SicA > sipB > sipC > sipD > sipA > iacP | C                  |                           |
| 936157  | Salmonella enterica subsp. enterica serovar Weitevreden str. 2007-60-3289-1      | YP_006887260 | 409246556 | SicA > sipB > sipC > sipD > sipA > iacP | C                  |                           |
| 1271862 | Salmonella enterica subsp. enterica serovar Typhimurium var. 5- str. CFSAN001921 | YP_008253938 | 525837204 | SicA > sipB > sipC > sipD > sipA > iacP | C                  |                           |
| 990282  | Salmonella enterica subsp. enterica serovar Typhimurium str. UK-1                | YP_005253374 | 378990210 | SicA > sipB > sipC > sipD > sipA > iacP | C                  |                           |
| 1171376 | Salmonella enterica subsp. enterica serovar Typhimurium str. U288                | YP_007904007 | 482905447 | SicA > sipB > sipC > sipD > sipA > iacP | C                  |                           |
| 718274  | Salmonella enterica subsp. enterica serovar Typhimurium str. T000240             | YP_005248630 | 378985474 | SicA > sipB > sipC > sipD > sipA > iacP | C                  |                           |
| 909946  | Salmonella enterica subsp. enterica serovar Typhimurium str. ST4/74              | YP_005243866 | 379702138 | SicA > sipB > sipC > sipD > sipA > iacP | C                  |                           |
| 216597  | Salmonella enterica subsp. enterica serovar Typhimurium str. SL1344              | YP_005182753 | 378700796 | SicA > sipB > sipC > sipD > sipA > iacP | C                  |                           |
| 99287   | Salmonella enterica subsp. enterica serovar Typhimurium str. LT2                 | NP_461806    | 16766191  | SicA > sipB > sipC > sipD > sipA > iacP | C                  |                           |
| 568709  | Salmonella enterica subsp. enterica serovar Typhimurium str. DT2                 | YP_008645647 | 549725457 | SicA > sipB > sipC > sipD > sipA > iacP | C                  |                           |
| 1008297 | Salmonella enterica subsp. enterica serovar Typhimurium str. 798                 | YP_005398248 | 383497559 | SicA > sipB > sipC > sipD > sipA > iacP | C                  |                           |
| 588858  | Salmonella enterica subsp. enterica serovar Typhimurium str. 140285              | YP_005238994 | 378451634 | SicA > sipB > sipC > sipD > sipA > iacP | C                  | 1                         |
| 1064551 | Salmonella enterica subsp. enterica serovar Thompson str. RM6836                 | YP_008614521 | 549480319 | SicA > sipB > sipC > sipD > sipA > iacP | C                  |                           |
| 1298917 | Salmonella enterica subsp. enterica serovar Pullorum str. S06004                 | YP_008382148 | 529220768 | SicA > sipB > sipC > sipD > sipA > iacP | C                  |                           |
| 476213  | Salmonella enterica subsp. enterica serovar Paratyphi C str. RK54594             | YP_002638461 | 224584663 | SicA > sipB > sipC > sipD > sipA > iacP | C                  |                           |
| 1016998 | Salmonella enterica subsp. enterica serovar Paratyphi B str. SP87                | YP_001589762 | 161615797 | SicA > sipB > sipC > sipD > sipA > iacP | C                  |                           |
| 1267753 | Salmonella enterica subsp. enterica serovar Javiana str. CFSAN001992             | YP_007473536 | 452123288 | SicA > sipB > sipC > sipD > sipA > iacP | C                  |                           |
| 454169  | Salmonella enterica subsp. enterica serovar Heidelberg str. SL476                | YP_002046845 | 194449012 | SicA > sipB > sipC > sipD > sipA > iacP | C                  |                           |
| 1271864 | Salmonella enterica subsp. enterica serovar Heidelberg str. CFSAN002069          | YP_008252329 | 525829260 | SicA > sipB > sipC > sipD > sipA > iacP | C                  |                           |
| 1160717 | Salmonella enterica subsp. enterica serovar Heidelberg str. B182                 | YP_006088973 | 386592573 | SicA > sipB > sipC > sipD > sipA > iacP | C                  |                           |
| 1124936 | Salmonella enterica subsp. enterica serovar Heidelberg str. 41578                | YP_008248603 | 525818675 | SicA > sipB > sipC > sipD > sipA > iacP | C                  |                           |
| 1081093 | Salmonella enterica subsp. enterica serovar Gallinarum/pullorum str. RK55078     | YP_005213993 | 378956506 | SicA > sipB > sipC > sipD > sipA > iacP | C                  |                           |
| 1225522 | Salmonella enterica subsp. enterica serovar Gallinarum/pullorum str. CDC1983-67  | YP_008482448 | 537438071 | SicA > sipB > sipC > sipD > sipA > iacP | C                  |                           |
| 550537  | Salmonella enterica subsp. enterica serovar Enteritidis str. P125109             | YP_002244798 | 207858147 | SicA > sipB > sipC > sipD > sipA > iacP | C                  |                           |
| 439851  | Salmonella enterica subsp. enterica serovar Dublin str. CT_02021853              | YP_002216854 | 198243016 | SicA > sipB > sipC > sipD > sipA > iacP | C                  |                           |
| 1173427 | Salmonella enterica subsp. enterica serovar Bareilly str. CFSAN000189            | YP_008307500 | 525946351 | SicA > sipB > sipC > sipD > sipA > iacP | C                  |                           |
| 209261  | Salmonella enterica subsp. enterica serovar Typhi str. Ty2                       | NP_806488    | 29143146  | SicA > sipB > sipC > sipD > sipA > iacP | C                  |                           |
| 527001  | Salmonella enterica subsp. enterica serovar Typhi str. Ty21a                     | YP_007927058 | 488655255 | SicA > sipB > sipC > sipD > sipA > iacP | C                  |                           |
| 1132507 | Salmonella enterica subsp. enterica serovar Typhi str. P-stx-12                  | YP_005218431 | 378960945 | SicA > sipB > sipC > sipD > sipA > iacP | C                  |                           |
| 220341  | Salmonella enterica subsp. enterica serovar Typhi str. CT18                      | NP_457279    | 16761662  | SicA > sipB > sipC > sipD > sipA > iacP | C                  |                           |
| 439843  | Salmonella enterica subsp. enterica serovar Schwarzengrund str. CVM19633         | YP_002115837 | 194735025 | SicA > sipB > sipC > sipD > sipA > iacP | C                  |                           |
| 877468  | Salmonella enterica subsp. enterica serovar Newport str. USMARC-53124.1          | YP_008361892 | 528820689 | SicA > sipB > sipC > sipD > sipA > iacP | C                  |                           |
| 423368  | Salmonella enterica subsp. enterica serovar Newport str. SL254                   | YP_002042126 | 194444977 | SicA > sipB > sipD > sipA > iacP        | C                  |                           |
| 454166  | Salmonella enterica subsp. enterica serovar Agona str. SL483                     | YP_002147782 | 197249542 | SicA > sipB > sipC > sipD > sipA > iacP | C                  |                           |
| 1406860 | Salmonella enterica subsp. enterica serovar Agona str. 24249                     | YP_008862315 | 563654231 | SicA > sipB > sipC > sipD > sipA > iacP | C                  |                           |

|          |                                                                                  |              |           |                                                          |   |    |
|----------|----------------------------------------------------------------------------------|--------------|-----------|----------------------------------------------------------|---|----|
| 218493   | <i>Salmonella bongori</i> NCTC 12419                                             | YP_004731325 | 340000441 | Sica > sipB > sipC > sipD > sipA > iacP                  | C | 2  |
| 11971719 | <i>Salmonella bongori</i> NZ68-08                                                | YP_008323503 | 526228860 | Sica > sipB > sipC > sipD > sipA > iacP                  | C |    |
| 1271863  | <i>Salmonella enterica</i> subsp. enterica serovar Cubana str. CFSAN002050       | YP_008262016 | 525858673 | Sica > sipB > sipC > sipD > sipA > iacP                  | C |    |
| 882884   | <i>Salmonella enterica</i> subsp. enterica serovar 62:z4,z23:- str. RSK2980      | YP_001569183 | 161502071 | Sica > sipB > sipC > sipD > sipA > iacP                  | C |    |
| 243365   | <i>Chromobacterium violaceum</i> ATCC 12472                                      | NP_902289    | 34498074  | Sica > sipB > sipC > sipD > sipA > iacP                  | C | 3  |
| 1380774  | <i>Pandoraea</i> sp. RB-44                                                       | YP_008879851 | 564915616 | Sica > sipB > sipC > sipD > sipA                         | V |    |
| 1416914  | <i>Pandoraea pnomenus</i> 3kgm                                                   | YP_008838747 | 560146288 | Sica > sipB > sipC > sipD > sipA                         | V |    |
| 344609   | <i>Shigella boydii</i> CDC 3083-94                                               | YP_001883189 | 187734498 | Sica > sipB > sipC > sipD > sipA > iacP                  | C | 4  |
| 300267   | <i>Shigella dysenteriae</i> Sd197                                                | YP_406167    | 82524572  | Sica > sipB > sipC > sipD > sipA > iacP                  | C | 5  |
| 754093   | <i>Shigella dysenteriae</i> 1617                                                 | YP_008832519 | 560133475 | Sica > sipB > sipC > sipD > sipA > iacP                  | C |    |
| 198214   | <i>Shigella flexneri</i> 2a str. 301                                             | NP_858261    | 31983588  | Sica > sipB > sipC > sipD > sipA > iacP                  | C | 6  |
| 591020   | <i>Shigella flexneri</i> 2002017                                                 | YP_005712020 | 384546108 | Sica > sipB > sipC > sipD > sipA > iacP                  | C |    |
| 300269   | <i>Shigella sonnei</i> S5046                                                     | YP_313345    | 74314927  | Sica > sipB > sipC > sipD > sipA > iacP                  | C | 7  |
| 216599   | <i>Shigella sonnei</i> 53G                                                       | YP_005454433 | 383181838 | Sica > sipB > sipC > sipD > sipA > iacP                  | C |    |
| 572265   | <i>Candidatus</i> <i>Hamiltonella defensa</i> 5AT ( <i>Acyrthosiphon pisum</i> ) | YP_002924283 | 238898602 | Sica > sipB                                              | C | 25 |
| 216592   | <i>Escherichia coli</i> O42                                                      | YP_006098293 | 387609437 | Sica > sipB > SipD                                       | V |    |
| 585056   | <i>Escherichia coli</i> UMN026                                                   | YP_002414816 | 218707297 | Sica > sipB > SipD                                       | V |    |
| 439855   | <i>Escherichia coli</i> SMS-3-5                                                  | YP_001745983 | 170681556 | Sica > sipB > SipD                                       | V |    |
| 585057   | <i>Escherichia coli</i> IA139                                                    | YP_002410127 | 218702498 | Sica > sipB > SipD                                       | V |    |
| 1072459  | <i>Escherichia coli</i> O7:K1 str. CE10                                          | YP_006146280 | 386626552 | Sica > sipB > SipD                                       | V | 26 |
| 1207075  | <i>Pseudomonas putida</i> UW4                                                    | YP_007030620 | 426410521 | Sica > sipB > sipC > sipD > iacP                         | C | 15 |
| 1114970  | <i>Pseudomonas fluorescens</i> F113                                              | YP_005207210 | 378949722 | Sica > sipB > sipC > sipD > iacP                         | C | 16 |
| 343509   | <i>Sodalis glossinidius</i> str. 'morisitans'                                    | YP_454254    | 85058552  | Sica > sipB                                              | C | 22 |
| 665029   | <i>Erwinia amylovora</i> CFBP1430                                                | YP_003530148 | 292487276 | Sica > sipB > sipC > sipD > Y1 > Y2 > iacP               | C |    |
| 716540   | <i>Erwinia amylovora</i> ATCC 49946                                              | YP_003539721 | 292900352 | Sica > sipB > sipC > sipD > Y1 > Y2 > iacP               | C | 10 |
| 465817   | <i>Erwinia tasmaniensis</i> ET1/99                                               | YP_001908602 | 188534805 | Sica > sipB > sipC > sipD > Y1 > Y2 > iacP               | C | 11 |
| 465817   | <i>Erwinia tasmaniensis</i> ET1/99                                               | YP_001907829 | 188534032 | Sica > sipB > sipC > sipD                                | C | 21 |
| 665029   | <i>Erwinia amylovora</i> CFBP1430                                                | YP_003530949 | 292488072 | Sica > sipB > sipC > sipD > Y1 > Y2 > iacP               | C |    |
| 716540   | <i>Erwinia amylovora</i> ATCC 49946                                              | YP_003538652 | 292899283 | Sica > sipB > sipC > sipD > Y3 > Y4 > iacP               | C | 8  |
| 215689   | <i>Erwinia</i> sp. E1p617                                                        | YP_005819304 | 385788195 | Sica > sipB > sipC > sipD                                | L | 19 |
| 694499   | <i>Erwinia pyrifoliae</i> Epl/96                                                 | YP_002648989 | 259908633 | Sica > sipB > sipC > Y5 > iacP                           | L | 9  |
| 644651   | <i>Erwinia pyrifoliae</i> DSM 12163                                              | YP_005802892 | 387871518 | Sica > sipB > sipC > sipD                                | L | 20 |
| 1266738  | <i>Proteus mirabilis</i> B82000                                                  | YP_008399198 | 529238339 | Sica > sipB > sipD                                       | I |    |
| 529507   | <i>Proteus mirabilis</i> H4320                                                   | YP_002152384 | 197286512 | Sica > sipB > sipD                                       | I | 24 |
| 380358   | <i>Xanthomonas albilineans</i> GPE PC73                                          | YP_003375999 | 285018288 | Sica > sipB > sipC                                       | T | 23 |
| 1249661  | <i>Burkholderia thailandensis</i> MSMB121                                        | YP_007920472 | 488607335 | Sica > sipB > sipC > X > sipD > Y6 > iacP                | C | 14 |
| 271848   | <i>Burkholderia thailandensis</i> E264                                           | YP_439038    | 83717078  | Sica > sipB > sipC > X > sipD > Y7 > iacP                | C |    |
| 320373   | <i>Burkholderia pseudomallei</i> 668                                             | YP_001063156 | 126443663 | Sica > sipB > sipC > X > sipD > Y8 > iacP                | C | 12 |
| 1335307  | <i>Burkholderia pseudomallei</i> MSHR305                                         | YP_008328618 | 526458406 | Sica > sipB > sipC > X > sipD > Y9 > iacP                | C |    |
| 320372   | <i>Burkholderia pseudomallei</i> 1710b                                           | YP_335730    | 76818804  | Sica > sipB > sipC > X > sipD > Y10 > iacP               | C |    |
| 884204   | <i>Burkholderia pseudomallei</i> 1026b                                           | YP_006278262 | 386865314 | Sica > sipB > sipC > X > sipD > Y11 > iacP               | C |    |
| 357348   | <i>Burkholderia pseudomallei</i> 1106a                                           | YP_001076107 | 126458255 | Sica > sipB > sipC > X > sipD > Y12 > iacP               | C |    |
| 1229785  | <i>Burkholderia pseudomallei</i> BPC006                                          | YP_006658905 | 403523336 | Sica > sipB > sipC > X > sipD > Y13 > iacP               | C |    |
| 1241583  | <i>Burkholderia pseudomallei</i> NCTC 13179                                      | YP_008740595 | 556574230 | Sica > sipB > sipC > X > sipD > Y14 > iacP               | C |    |
| 243160   | <i>Burkholderia mallei</i> ATCC 23344                                            | YP_106121    | 53716467  | Sica > sipB > sipC > X > sipD > Y15 > iacP               | C |    |
| 243160   | <i>Burkholderia pseudomallei</i> K96243                                          | YP_111538    | 53722553  | Sica > sipB > sipC > X > sipD > Y16 > iacP               | C |    |
| 320389   | <i>Burkholderia mallei</i> NCTC 10247                                            | YP_001077954 | 126447280 | Sica > sipB > sipC > X > sipD > Y17 > iacP               | C | 13 |
| 412022   | <i>Burkholderia mallei</i> NCTC 10229                                            | YP_001025869 | 124382983 | Sica > sipB > sipC > X > sipD > Y18 > iacP               | C |    |
| 1157951  | <i>Providencia stuartii</i> MRSN 2154                                            | YP_006216503 | 386743324 | Sica > sipB > sseC > sipC > Y19 > Y20 > Y21 > Y22 > iacP | C | 18 |
| 393305   | <i>Yersinia enterocolitica</i> subsp. <i>enterocolitica</i> 8081                 | YP_001007693 | 123443722 | Sica > sipB > sipC > sipD > Y23 > iacP                   | C | 17 |
