# Supplementary material for: Acylation of the Type 3 Secretion System Translocon Using a Dedicated Acyl Carrier Protein
Source: PubMed Central journal article supplement (PMC5279801; doi:10.1371/journal.pgen.1006556), 2017-01-13
Supplement: pgen.1006556.s007.pdf [file pgen.1006556.s007.pdf]

S2 Table. List of Bacterial strains

| Name                                                         | Lab n° | Description and Resistance                                                                     | Reference  |
|--------------------------------------------------------------|--------|------------------------------------------------------------------------------------------------|------------|
| <b><i>Salmonella enterica</i> serovar Typhimurium 12023</b>  |        |                                                                                                |            |
| WT                                                           | JV01   | NCTC 12023                                                                                     | Lab stock  |
| IacP_TAP                                                     | JV48   | [Kan <sup>R</sup> ]                                                                            | [18]       |
| IacP <sub>S38T</sub> _TAP                                    | JV56   | [Kan <sup>R</sup> ]                                                                            | [18]       |
| ACP_TAP                                                      | JV57   | acpP_TAP tag [Kan <sup>R</sup> ]                                                               | This study |
| <i>ΔiacP</i>                                                 | JV43   | <i>ΔiacP</i> :: kan <sup>R</sup>                                                               | This study |
| <i>ΔiacP</i>                                                 | JV52   | <i>ΔiacP</i> :: FRT Kan <sup>S</sup>                                                           | This study |
| <i>ΔsipB</i>                                                 | JV76   | <i>ΔsipB</i> :: kan <sup>R</sup>                                                               | This study |
| <b><i>Salmonella enterica</i> serovar Typhimurium SL1344</b> |        |                                                                                                |            |
| WT                                                           | JV112  |                                                                                                |            |
| <i>ΔiacP</i>                                                 | JV113  | <i>ΔiacP</i> :: kan <sup>R</sup>                                                               | This study |
| <i>ΔsipB</i>                                                 | JV114  | <i>ΔsipB</i> :: kan <sup>R</sup>                                                               | This study |
| SipB <sub>C316A</sub>                                        | JV123  | <i>sipB</i> <sub>C316A</sub>                                                                   | This study |
| <i>ΔiacP</i> SipB <sub>C316A</sub>                           | JV124  | <i>ΔiacP</i> :: kan <sup>R</sup> <i>sipB</i> <sub>C316A</sub>                                  | This study |
| <i>ΔiacP</i> <sub>intra</sub>                                | JV129  | <i>ΔiacP</i> <sub>nt 23-150</sub> :: kan <sup>R</sup>                                          | This study |
| <b><i>Escherichia coli</i></b>                               |        |                                                                                                |            |
| DH5α                                                         | EB070  | <i>fhuA2 Δ(argF-lacZ)U169 phoA glnV44 Φ80 Δ(lacZ)M15 gyrA96 recA1 relA1 endA1 thi-1 hsdR17</i> | Lab stock  |
| BTH101                                                       | EB003  | F-, <i>cya-99, araD139, galE15, galK16, rpsL1</i><br>(Str r), <i>hsdR2, mcrA1, mcrB1</i>       | [22]       |
| MG1655 <i>ΔgltA</i>                                          | EB1008 | <i>ΔgltA</i> ::Kan <sup>R</sup>                                                                | This study |
