# Supplementary material for: Acylation of the Type 3 Secretion System Translocon Using a Dedicated Acyl Carrier Protein
Source: PubMed Central journal article supplement (PMC5279801; doi:10.1371/journal.pgen.1006556), 2017-01-13
Supplement: pgen.1006556.s008.pdf [file pgen.1006556.s008.pdf]

S3 Table. List of Plasmids

| Name                             | Lab code | Description                                                                                                                                                                     | Reference           |
|----------------------------------|----------|---------------------------------------------------------------------------------------------------------------------------------------------------------------------------------|---------------------|
| pCP20                            | pEB266   | Amp <sup>R</sup> , Cam <sup>R</sup> , ts-rep                                                                                                                                    | (41)                |
| pKD46                            | pEB267   | Amp <sup>R</sup> , repA101ts & oriR101                                                                                                                                          | (40)                |
| pKD4                             | pEB269   | Amp <sup>R</sup> , Kan <sup>R</sup> , oriR6K $\gamma$                                                                                                                           | (40)                |
| pJL72                            | pEB793   | Amp <sup>R</sup> , Kan <sup>R</sup> , colE1 ori                                                                                                                                 | (42)                |
| pSB2194                          | pSB2194  | Tet <sup>R</sup> , oriR6K $\gamma$                                                                                                                                              | (32)                |
| pKT25link                        | pEB354   | Kan <sup>R</sup> , p15A ori, <i>Plac</i> , T25                                                                                                                                  | (37)                |
| pT25_SipB                        | pJV28    | <i>sipB</i> (PCR with primers ebm 820/821) cloned into pEB354 at sites XbaI/ XhoI                                                                                               | This work           |
| pT25_SipB <sub>3Flag</sub>       | pJV31    | <i>sipB</i> <sub>3F</sub> , which is version of <i>sipB</i> containing a 3 Flag tag (PCR with primers ebm 820/821, template pSB2194) was cloned into pEB354 at sites XbaI/ XhoI | This work           |
| pT25_SipB-SicA                   | pJV56    | <i>sicA</i> (PCR with primers ebm 1042/1043) cloned in operon with <i>sipB</i> into pJV28 at site XhoI                                                                          | This work           |
| pT25_SipB <sub>3Flag</sub> -SicA | pJV69    | The XbaI/SmaI fragment from pJV31 was used to replace the corresponding fragment in pJV56                                                                                       | This work           |
| pT25_SipB <sub>237TEV</sub>      | pJV127   | <i>sipB</i> <sub>237TEV</sub> (PCR with primers ebm 820/821) cloned into pEB354 at sites XbaI/ XhoI                                                                             | This work           |
| pT25_SipB <sub>C316A</sub>       | pJV108   | <i>sipB</i> <sub>C316A</sub> (PCR with primers ebm 820/821) cloned into pEB354 at sites XbaI/ XhoI                                                                              | This work           |
| pUT18Clink                       | pEB355   | Amp <sup>R</sup> , colE1 ori, <i>Plac</i> , T18                                                                                                                                 | (37)                |
| pT18_ACP                         | pEB379   |                                                                                                                                                                                 | (37)                |
| pT18_IacP                        | pJV1     |                                                                                                                                                                                 | (18)                |
| pT18_IacP <sub>S38T</sub>        | pJV18    |                                                                                                                                                                                 | (18)                |
| pT18_IacP-SicA                   | pJV34    | <i>sicA</i> (PCR with primers ebm 1042/1043) cloned in operon with <i>iacP</i> into pJV1 at site XhoI                                                                           | This work           |
| pT18_sicA                        | pJV32    | <i>sicA</i> (PCR with primers ebm 1041/1043) cloned into pEB355 at sites EcoRI/XhoI                                                                                             | This work           |
| pP <sub>TET</sub>                | pEB1242  | Amp <sup>R</sup> , colE1 ori, P <sub>TET</sub> , 6His                                                                                                                           | pASK-IBA37plus, IBA |
| pP <sub>TET</sub> B              | pJV84    | <i>sipB</i> (PCR with primers ebm 1134/821) cloned into pEB1242 at sites SacI/ XhoI                                                                                             | This work           |

|                                                         |        |                                                                                                                                                                  |           |
|---------------------------------------------------------|--------|------------------------------------------------------------------------------------------------------------------------------------------------------------------|-----------|
| pP <sub>TET</sub> BA                                    | pJV85  | <i>sicA</i> (PCR with primers ebm 1042/1183) cloned into pJV84 at sites XhoI/PstI                                                                                | This work |
| pP <sub>TET</sub> BAP                                   | pJV86  | <i>iacP</i> (PCR with primers ebm 1184/1185) cloned into pJV85 at sites PstI/ EcoRV                                                                              | This work |
| pP <sub>TET</sub> BAP <sub>S38T</sub>                   | pJV87  | <i>iacP</i> <sub>S38T</sub> (PCR with primers ebm 1184/1185) cloned into pJV85 at sites PstI/ EcoRV                                                              | This work |
| pP <sub>TET</sub> B <sub>237TEV</sub> A                 | pJV129 | <i>sipB</i> <sub>237TEV</sub> and <i>sicA</i> (PCR with primers ebm 1134/821 and 1042/1183) cloned into pEB1242 at sites SacI/ XhoI and XhoI/ PstI, respectively | This work |
| pP <sub>TET</sub> B <sub>237TEV</sub> AP                | pJV131 | <i>iacP</i> (PCR with primers ebm 1184/1185) cloned into pJV129 at sites PstI/ EcoRV                                                                             | This work |
| pP <sub>TET</sub> B <sub>C316A</sub> A                  | pJV134 | <i>sipB</i> <sub>C316A</sub> (PCR with primers ebm 1134/821) replaced <i>sipB</i> at sites SacI/ XhoI in pJV85                                                   | This work |
| pP <sub>TET</sub> B <sub>C316A</sub> AP                 | pJV135 | <i>sipB</i> <sub>C316A</sub> (PCR with primers ebm 1134/821) replaced <i>sipB</i> at sites SacI/ XhoI in pJV86                                                   | This work |
| pP <sub>TET</sub> B <sub>C316A</sub> AP <sub>S38T</sub> | pJV136 | <i>sipB</i> <sub>C316A</sub> (PCR with primers ebm 1134/821) replaced <i>sipB</i> at sites SacI/ XhoI in pJV87                                                   | This work |
| pP <sub>TET</sub> <i>iacP</i>                           | pJV102 | <i>iacP</i> (PCR with primers ebm 674/675) cloned into pEB1242 at sites EcoRI/ XhoI                                                                              | This work |
| pP <sub>TET</sub> <i>iacP</i> <sub>S38T</sub>           | pJV152 | <i>iacP</i> <sub>S38T</sub> (PCR with primers ebm 674/675) cloned into pEB1242 at sites EcoRI/ XhoI                                                              | This work |
| pKO3                                                    | pEB232 | Cm <sup>R</sup> , repA(ts) ori, M13 ori, <i>sacB</i>                                                                                                             | (39)      |
| pKO3 <i>sipB</i> <sub>C316A</sub>                       | pJV153 | <i>sipB</i> <sub>C316A</sub> (PCR with primers ebm 1402/821) cloned into pEB232 at sites BamHI/ Sall                                                             | This work |
