# Supplementary material for: Acylation of the Type 3 Secretion System Translocon Using a Dedicated Acyl Carrier Protein
Source: PubMed Central journal article supplement (PMC5279801; doi:10.1371/journal.pgen.1006556), 2017-01-13
Supplement: pgen.1006556.s009.pdf [file pgen.1006556.s009.pdf]

#### S4 Table. List of Primers

Chromosomal sequences are in upper cases, restriction sites are in bold and ribosome binding sites are underlined.

| <b>Primer</b> | <b>Sequence 5'-3'</b>                                            |
|---------------|------------------------------------------------------------------|
| ebm674        | tctaga <b>attc</b> ATGAATATGGATATTGAAGCAAGAGTC                   |
| ebm675        | ttg <b>ctcgag</b> CTACACCCTGGACTCAAGAC                           |
| ebm733        | TTAACCGGGAAAGATGCGATGAATATGGATATTGAAGCAAtgttaggctggagctgcttc     |
| ebm734        | ATAACAATTAATCTTATTCAATTGTTGTCAAGCGAGAGAAAAATAcatatgaatcctccttag  |
| ebm798        | GATCTTTACGCTGACACATTGGATTTAATTG                                  |
| ebm799        | CAATTAATCCAATGTGTCAGCGTAAAGATC                                   |
| ebm805        | CGTTCAGGCTGCCATTGATTACATCAACGGCCACCAGGCGtccatggaaaagagaag        |
| ebm806        | TAAAACTCAGGCGGTCTGAACGACCGCCTGGAGATGTTACcatatgaatcctccttag       |
| ebm820        | tct <b>ctagaattc</b> ATGGTAAATGACGCAAGTAGC                       |
| ebm821        | ct <b>ctcgag</b> TTATGCGCGACTCTGGCGCAG                           |
| ebm899        | TACTAATTAACATATTTTTCTCCCTTTATTTTGGCAGTTTcatatgaatcctccttag       |
| ebm1012       | CGGAGACAGAGCAGCACAGTGAACAAGAAAAGGAATAATTgtgtaggctggagctgcttc     |
| ebm1041       | gaaga <b>attc</b> ATGGATTATCAAAATAATGTCAG                        |
| ebm1042       | ct <b>ctcgagaagg</b> gatataccATGGATTATCAAAATAATGTCAG             |
| ebm1043       | ct <b>ctcgag</b> TTATTCCTTTTCTTGTTCACTG                          |
| ebm1134       | gaggag <b>ctc</b> ATGGTAAATGACGCAAGTAGC                          |
| ebm1183       | ctg <b>ctcgag</b> TTATTCCTTTTCTTGTTCACTGTG                       |
| ebm1184       | ctg <b>ctcgagaagg</b> gatataccATGAATATGGATATTGAAGCAAGAGTC        |
| ebm1185       | gat <b>gatate</b> CTACACCCTGGACTCAAGAC                           |
| ebm1274       | GGAAACGAACCGCATTATGGGA <sub>gc</sub> TATCGGGAAAGTCCTCGGCGC       |
| ebm1275       | GCGCCGAGGACTTTCCCGATA <sub>gc</sub> TCCCATAATGCGGTTTCGTTTCC      |
| ebm1361       | gccctggaaatacaagtttcGGCGGCATTAGCCGTTCCCTG                        |
| ebm1362       | gaaaactgtattccagggcTCTCAGAATCAGGTTTCCAG                          |
| ebm1402       | ggaggat <b>cc</b> ATGGTAAATGACGCAAGTAG                           |
| ebm1437       | CATCATATCAGGAAGATCGTTTTTCATTGCAACTAATGTCAAACCTcatatgaatcctccttag |
